# Supplementary material
Source: PubMed Central journal article supplement (PMC4241868)
Supplement: Supp_Table1.pdf [file Supp_Table1.pdf]

SUPPLEMENTARY TABLE S1. COLLAGEN I SOURCES AND SOLUBILIZATION METHODS

| <i>Source</i>      | <i>Manufacturer<br/>(if applicable)</i>             | <i>Solubilization</i>                                   | <i>Solvent of<br/>final solution</i> | <i>Stock collagen<br/>concentration</i> | <i>Reference(s)</i>                                      |
|--------------------|-----------------------------------------------------|---------------------------------------------------------|--------------------------------------|-----------------------------------------|----------------------------------------------------------|
| Bovine<br>Dermis   | Advanced<br>BioMatrix<br>(Vitrogen 100/<br>PureCol) | Pepsin digestion                                        | 0.01–0.012 N HCl                     | ~ 3 mg/mL                               | 12, 16, 19, 27,<br>29, 53, 59, 63, 64,<br>67, 72, 74, 75 |
|                    | Roche (Collagen S)<br>Sigma                         | 0.5 M acetic acid<br>Acid-salt<br>precipitation         | Unknown<br>0.01 M HCl                | Unknown<br>n/a (lyophilized)            | 14<br>12, 60                                             |
|                    | Organogenesis<br>Sigma                              | Unknown acid<br>Sodium<br>phosphate<br>precipitation    | Unknown<br>0.01 M HCl                | 2.2 mg/mL<br>10 mg/mL                   | 55, 65<br>36, 99                                         |
| Porcine<br>Dermis  | In-house<br>extraction                              | HCl + NaN <sub>3</sub> ,<br>pepsin<br>digestion         | 0.5 M (3%) acetic<br>acid            | 10 mg/mL                                | 30                                                       |
|                    | In-house<br>extraction                              | Acid-salt<br>precipitation                              | 0.01 M HCl                           | n/a (lyophilized)                       | 12, 66, 76                                               |
| Tendon             | Nitta Gelatin, Inc.<br>(Cellmatrix<br>Type 1-A)     | Unknown acid                                            | Unknown                              | 3 mg/mL                                 | 13                                                       |
|                    | In-house<br>extraction                              | NaCl + HCL,<br>pepsin<br>digestion                      | 0.01 N acetic acid                   | n/a (lyophilized)                       | 99                                                       |
| Rat tail<br>Tendon | BD Biosciences<br>“low<br>concentration”            | 0.5 M acetic acid                                       | 0.01–0.02 M<br>acetic acid           | 3–4 mg/mL                               | 51, 57, 58, 61, 67,<br>73, 77, 80                        |
|                    | BD Biosciences<br>“high<br>concentration”           | 0.5 M acetic acid                                       | 0.01–0.02 M<br>acetic acid           | 8–11 mg/mL                              | 12, 21, 26, 34, 41,<br>43, 47–49, 56, 78                 |
|                    | Sigma                                               | 0.1 M acetic acid                                       | 0.1 M acetic acid                    | 2 mg/mL                                 | 71                                                       |
|                    | In-house<br>extraction                              | 0.1% acetic acid                                        | 0.1% acetic acid                     | 8–30 mg/mL                              | 44                                                       |
|                    | In-house<br>extraction                              | Unknown acid                                            | 0.017 M (0.1%)<br>acetic acid        | 10 mg/mL                                | 40                                                       |
|                    | In-house<br>extraction                              | Acid-salt<br>precipitation<br>with 0.5 M<br>acetic acid | 0.5 M acetic acid                    | 0–500 mg/mL                             | 50                                                       |
|                    | In-house<br>extraction                              | Acid-salt<br>precipitation<br>and pepsin<br>digestion   | 0.005 M acetic<br>acid               | 0.20–0.21 mg/mL                         | 79                                                       |
|                    | In-house<br>extraction                              | Acid-salt<br>precipitation<br>and pepsin<br>digestion   | 0.5 M acetic acid                    | 2 mg/mL                                 | 38, 100                                                  |
|                    | In-house<br>extraction                              | 0.5 M acetic acid                                       | 0.02 M acetic<br>acid                | 5 mg/mL                                 | 21                                                       |
|                    | In-house<br>extraction                              | 0.5 M acetic acid                                       | HCl                                  | 4.29 mg/mL                              | 28                                                       |
|                    | In-house<br>extraction                              | 0.02 M acetic<br>acid                                   | 0.02 M acetic<br>acid                | 1.4–44 mg/mL                            | 35, 54, 70                                               |
|                    | In-house<br>extraction                              | Acid-salt<br>precipitation                              | Unknown                              | 5 mg/mL                                 | 15                                                       |
|                    | In-house<br>extraction                              | 0.01 M HCl                                              | 0.01 M HCl                           | 12–20 mg/mL                             | 52                                                       |
