# Supplementary material
Source: PubMed Central journal article supplement (PMC4241868)
Supplement: Supp_Table2.pdf [file Supp_Table2.pdf]

SUPPLEMENTARY TABLE S2. COLLAGEN CONCENTRATION  
IN HYDROGELS USED FOR TISSUE ENGINEERING

| <i>Collagen concentration<br/>(mg/mL)</i> | <i>Reference(s)</i>                  |
|-------------------------------------------|--------------------------------------|
| <b>Single concentration</b>               |                                      |
| 0.5                                       | 16                                   |
| 1                                         | 47, 49, 55, 58                       |
| 1.3                                       | 80                                   |
| 1.5                                       | 16, 67, 77                           |
| 1.67                                      | 29, 74                               |
| 2                                         | 35, 51, 53, 57–59, 62,<br>63, 68, 73 |
| 2.4                                       | 13, 72                               |
| 2.5                                       | 101                                  |
| 2.8                                       | 35                                   |
| 3                                         | 28, 61, 65, 77                       |
| 3.5                                       | 69                                   |
| 4                                         | 21, 26, 34                           |
| 5                                         | 15                                   |
| 7–7.5                                     | 48                                   |
| 8                                         | 52                                   |
| 9.15                                      | 78                                   |
| 10                                        | 30                                   |
| <b>Concentration range</b>                |                                      |
| 0–45                                      | 19                                   |
| 0.08–0.39                                 | 38                                   |
| 0.1–0.6                                   | 54                                   |
| 0.13–1.8                                  | 64                                   |
| 0.023–0.094                               | 79                                   |
| 0.3–1.0                                   | 70                                   |
| 0.3–1.08                                  | 71                                   |
| 0.5–2.75                                  | 76                                   |
| 0.5–3                                     | 66                                   |
| 0.5–4                                     | 12                                   |
| 0.67–2.5                                  | 75                                   |
| 1–3                                       | 60                                   |
| 1–4                                       | 41                                   |
| 1.5–3                                     | 40                                   |
| 1.5–4.5                                   | 56                                   |
| 2–20                                      | 27                                   |
| 3–6.5                                     | 43                                   |
| 3–20                                      | 44                                   |
| 40–300                                    | 50                                   |

1 mg/mL = 0.1% wt.
