# Supplementary material
Source: PubMed Central journal article supplement (PMC4241868)
Supplement: Supp_Table4.pdf [file Supp_Table4.pdf]

SUPPLEMENTARY TABLE S4. REVIEW OF COLLAGEN HYDROGEL MECHANICAL CHARACTERIZATION

| <i>Deformation mode</i>    | <i>Time scale of deformation</i>               | <i>Strain scale of deformation</i> | <i>Parameters varied</i>                                          | <i>Highlights of study</i>                                                                                                                                          | <i>Reference</i> |
|----------------------------|------------------------------------------------|------------------------------------|-------------------------------------------------------------------|---------------------------------------------------------------------------------------------------------------------------------------------------------------------|------------------|
| <i>Single-mode studies</i> |                                                |                                    |                                                                   |                                                                                                                                                                     |                  |
| Tension                    | 0.067%/s                                       | 30–50%                             | Collagen concentration, polymerization pH                         | Fiber structure imaging (confocal reflectance) during strain application; longer, thinner fibers correlate with higher strain                                       | 60               |
|                            | 0.07%/s                                        | 0–10%                              | Addition of polymers (including collagen) to PLGA hydrogels       | Collagen strengthens PLGA hydrogels                                                                                                                                 | 18               |
|                            | 0.67%/s                                        | 8–18% (break)                      | Addition of GAGs and fibroblasts to collagen hydrogels            | GAGs increase tensile modulus; fibroblasts reduce modulus                                                                                                           | 28               |
|                            | 0.8%/s                                         | 17–56% (break)                     | Addition of various crosslinkers to collagen hydrogels            | Crosslinkers increase tensile strength but reduce extensibility                                                                                                     | 15               |
|                            | 1.67%/s                                        | Not stated                         | Collagen concentration                                            | Studied EC traction in constrained or floating hydrogels; found larger capillary structures in constrained gels                                                     | 77               |
|                            | 5%/s (step) followed by relaxation             | 5–20%                              | Addition of agarose (varying concentration) to collagen hydrogels | Agarose slows hydrogel relaxation and reduces hydrogel compressibility                                                                                              | 55               |
| Compression (unconfined)   | 0.167%/s                                       | 2–5%                               | Addition of GAGs                                                  | GAGs increase compression modulus                                                                                                                                   | 85               |
| Compression (confined)     | 0.1%/s                                         | 0–10%                              | None                                                              | Anisotropy measurement during strain application; find that interstitial flow and fiber bending regulate stress response                                            | 65               |
|                            | 1%/s                                           | 5–15%                              | pH                                                                | Compression modulus increases with pH; ECs grown on rigid hydrogels migrate less but form deeper networks                                                           | 13               |
|                            | Step (rate unspecified) followed by relaxation | 3–20%                              | Collagen concentration                                            | Compression modulus increases with collagen concentration                                                                                                           | 44               |
| Shear (oscillatory)        | 0.016–16 Hz                                    | 2%                                 | Addition of protein supplements                                   | Collagen breaks down under shear with oscillation frequency above 3 Hz                                                                                              | 54               |
|                            | 0.1 Hz                                         | 0.5%                               | Collagen concentration, addition of GA                            | G' increases with concentration but pore size decreases; decoupled pore size and shear modulus and found cell spreading and migration depend primarily on pore size | 41               |
|                            | 0.1–1 Hz                                       | Not stated                         | Addition of protein supplements                                   | Fibronectin or laminin supplements at high concentration reduce G' and G'' of hydrogels                                                                             | 72               |
|                            | 0.1–100 Hz                                     | 5%                                 | Temperature, addition of GA                                       | G' and G'' are frequency independent at 5% strain; shear moduli increase with temperature and addition of GA                                                        | 26               |

(continued)

SUPPLEMENTARY TABLE S4. (CONTINUED)

| <i>Deformation mode</i>                               | <i>Time scale of deformation</i>      | <i>Strain scale of deformation</i> | <i>Parameters varied</i>                       | <i>Highlights of study</i>                                                                                                                                                                                                           | <i>Reference</i> |
|-------------------------------------------------------|---------------------------------------|------------------------------------|------------------------------------------------|--------------------------------------------------------------------------------------------------------------------------------------------------------------------------------------------------------------------------------------|------------------|
| Shear<br>(oscillatory)<br>(continued)                 | 0.4 Hz                                | 5%                                 | Addition of agarose                            | Agarose increases $G'$ but leaves gross fiber structure unchanged                                                                                                                                                                    | 16               |
|                                                       | 0.5–1 Hz                              | 5%                                 | Collagen vs. fibrin                            | Fibrin stiffer than collagen at same concentration                                                                                                                                                                                   | 59               |
|                                                       | 1 Hz                                  | 0.8%                               | Polymerization temperature                     | Modified temperature and measured shear moduli throughout polymerization; final $G'$ and $G''$ decrease slightly at higher temperatures                                                                                              | 47               |
|                                                       | 1.6 Hz                                | 5%                                 | Polymerization pH                              | $G'$ and $G''$ are frequency independent at 5% strain; shear moduli increase with pH                                                                                                                                                 | 34               |
|                                                       | 0.1–10 Hz                             | n/a (0.5 Pa)                       | Addition of GAGs                               | Chondroitin sulfate increases ECM void fraction, decreasing shear modulus; dextran does not affect mechanical properties                                                                                                             | 21               |
| Shear (creep)                                         | n/a                                   | n/a (9.5 Pa)                       | Addition of GA                                 | GA increases shear modulus; Voigt–Kelvin model describes creep test well                                                                                                                                                             | 30               |
| <i>Multimode studies</i>                              |                                       |                                    |                                                |                                                                                                                                                                                                                                      |                  |
| Tension<br>Compression<br>(unconfined)                | 0.03–0.04%/s<br>3.6%/s                | 0–40%<br>15–30%                    | Polymerization temperature, pH, ionic strength | Tensile and compression moduli increase with pH; fabrication at physiological temperature and pH does not result in physiological strength                                                                                           | 35               |
| Tension<br>Compression<br>(unconfined)                | 0.6%/s<br>2.76%/s                     | 20–80%<br>15–60%                   | Collagen source, concentration                 | High oligomer content may be linked to increased hydrogel strength                                                                                                                                                                   | 12               |
| Shear<br>(oscillatory)                                | 1 Hz                                  | 1%                                 |                                                |                                                                                                                                                                                                                                      |                  |
| Compression<br>(unconfined)<br>Shear<br>(oscillatory) | 2.76%/s<br>1 Hz                       | 10–30%<br>1%                       | Collagen concentration, molecular weight       | Compression and shear moduli are positively correlated with oligomer content (molecular weight); effect is stronger than that of concentration                                                                                       | 76               |
| Compression<br>(confined)<br>Shear<br>(oscillatory)   | 0.08%/s for ramp tests<br>0.016–16 Hz | 0–10%<br>1%                        | None                                           | Creep, ramp, and sinusoidal compression as well as oscillatory shear. Found that collagen hydrogels exhibit Maxwell behavior in both shear and compression with similar timescales; shear modulus is larger than compression modulus | 53               |

EC, endothelial cell; GA, glutaraldehyde; GAG, glycosaminoglycan; PLGA, poly (lactic-co-glycolic) acid.
